# Supplementary material for: Is Plasmodium vivax Malaria a Severe Malaria?: A Systematic Review and Meta-Analysis
Source: PubMed Central journal article supplement (PMC4133404; doi:10.1371/journal.pntd.0003071), 2014-08-14

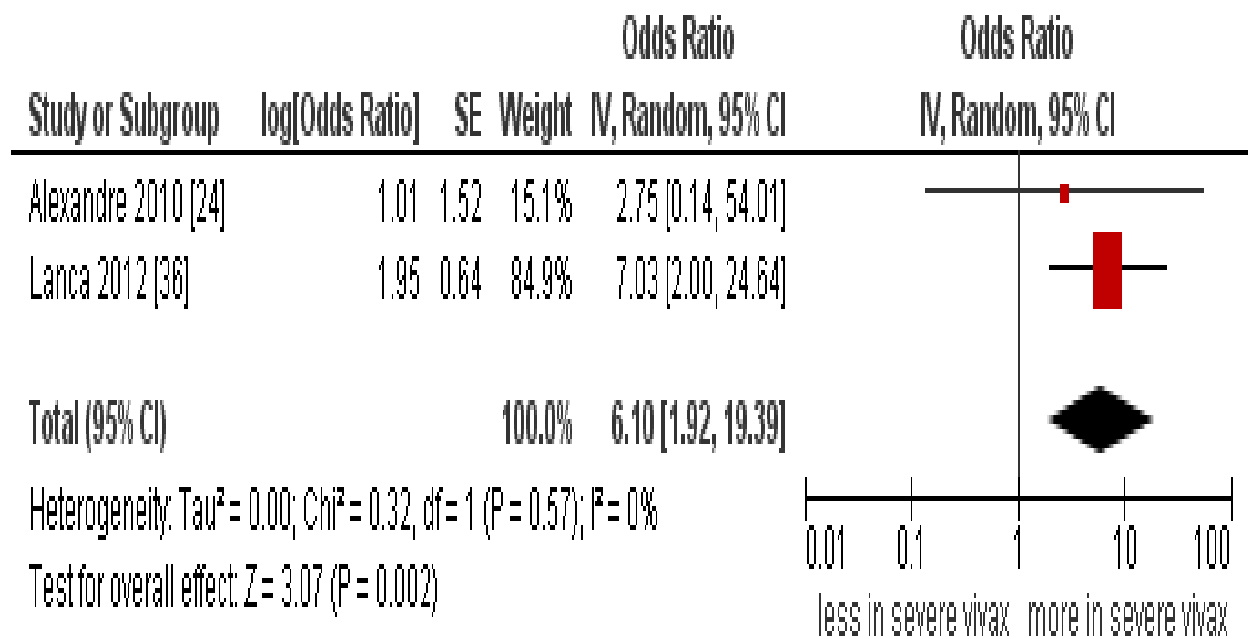

Supplement: pntd.0003071.s004.pdf [file pntd.0003071.s004.pdf]
